# 1 **Discovery of antimicrobial compounds from *Lendenfeldia*, *Ircinia* and** 2 ***Dysidea* sponges using bioassay guided fractionation of marine extracts**

3  
4  
5  
6 Mojdeh Dinarvand,<sup>†,‡</sup> Nicholas Proschogo,<sup>†</sup> Malcolm P. Spain,<sup>†</sup> Gayathri  
7 Nagalingam,<sup>‡,§,||,¶</sup> James A. Triccas<sup>‡,§,||,\*</sup> and Peter J. Rutledge<sup>†,\*</sup>

8  
9  
10 <sup>†</sup> School of Chemistry, The University of Sydney, Sydney, NSW 2006, Australia

11 <sup>‡</sup> Department of Infectious Diseases and Immunology, Faculty of Medicine and Health,  
12 The University of Sydney, NSW, Australia

13 <sup>§</sup> Tuberculosis Research Program, Centenary Institute, The University of Sydney, NSW,  
14 Australia

15 <sup>||</sup> Centre for Infectious Diseases and Microbiology Laboratory Services, Westmead  
16 Hospital, Westmead, NSW 2145, Australia

17 <sup>¶</sup> Marie Bashir Institute for Infectious Diseases and Biosecurity, The University of  
18 Sydney, NSW, Australia

19  
20 \* PJR: e-mail, [peter.rutledge@sydney.edu.au](mailto:peter.rutledge@sydney.edu.au); phone, +61 2 9351 5020.

21 \* JAT: e mail, [jamie.triccas@sydney.edu.au](mailto:jamie.triccas@sydney.edu.au); phone, +61 2 9036 6582.

22  
23  
24  *Supporting Information*

37 **ABSTRACT:** Multidrug resistant bacteria have emerged as a threat to public health all  
38 over the world. At the same time, the discovery of new bioactive small molecules with  
39 antimicrobial activity and suitable pharmacological properties has waned. Herein we  
40 report the screening of marine extracts to identify novel compounds with antimicrobial  
41 activity. Bioassay guided fractionation has enabled the discovery and identification of a  
42 family of simple amines with promising activity against methicillin resistant  
43 *Staphylococcus aureus* (MRSA). To confirm the natural product structures proposed,  
44 these compounds and analogues have been prepared synthetically. Several of the  
45 synthetic analogues showed promising bioactivity against the medically important  
46 pathogens MRSA (MICs to 12.5  $\mu$ M), *Mycobacterium tuberculosis* (MICs to 0.02  $\mu$ M),  
47 uropathogenic *Escherichia coli* (MIC 6.2  $\mu$ M) and *Pseudomonas aeruginosa* (MIC 3.1  
48  $\mu$ M). Cross-referencing antimicrobial activity and toxicity show that these synthetic  
49 compounds display a favourable therapeutic index for their target pathogens.

50

51

52

53

54

55

## 56 1. INTRODUCTION

57 Marine ecosystems have long been a rich source of bioactive natural products, in the  
 58 search for interesting molecules and novel therapeutic agents.<sup>1-5</sup> Many interesting and  
 59 structurally diverse secondary metabolites have been isolated from marine sources and  
 60 characterised over the last 70 years.<sup>6-9</sup> Yet the first ‘drugs from the sea’ were only  
 61 approved in the early 2000s: the cone snail peptide ziconotide ( $\omega$ -conotoxin MVIIA) in  
 62 2004 to alleviate chronic pain,<sup>10</sup> and sea squirt metabolite trabectedin in 2007 for  
 63 treatment of soft-tissue sarcoma.<sup>11</sup> Interest in marine natural products has continued to  
 64 grow since,<sup>6, 8-9</sup> spurred in part by the spread of antimicrobial resistant pathogens and the  
 65 need for new drugs to combat them.<sup>3</sup>

66

67 Human pathogens are associated with a variety of moderate to severe infections and the  
 68 recent rise of multi-drug resistant pathogens makes treatment more difficult. The last  
 69 two decades have seen the emergence of methicillin resistant *Staphylococcus aureus*  
 70 (MRSA) strains resistant even to ‘drugs of last resort’ such as vancomycin,<sup>12</sup> and  
 71 *Mycobacterium tuberculosis* resistant to all front-line drugs,<sup>13-15</sup> which highlights the  
 72 urgent need to find new effective antibiotics. Natural products continue to offer a  
 73 productive source of structural diversity and bioactivity, and are an important source for  
 74 new drugs.<sup>3-4, 6-7</sup>

75

76 In the search for new antimicrobial agents, we screened a set of marine extracts<sup>16</sup> to  
 77 determine activity against antibiotic resistant microorganisms using a high-throughput  
 78 screening (HTS) assay. Fractionation and purification of active components by high-

performance liquid chromatography (HPLC) and structural elucidation using high resolution and tandem mass spectrometry (MS) led us to a series of potential structures for new, bioactive amine natural products (Figure 1).

To validate the proposed structures, and to explore the potential of this compound class more broadly, analogues based on the general structures **1–5** were synthesised and evaluated as antimicrobial agents against a panel of medically important microorganisms: MRSA, *M. tuberculosis*, uropathogenic *Escherichia coli*, and *Pseudomonas aeruginosa*.

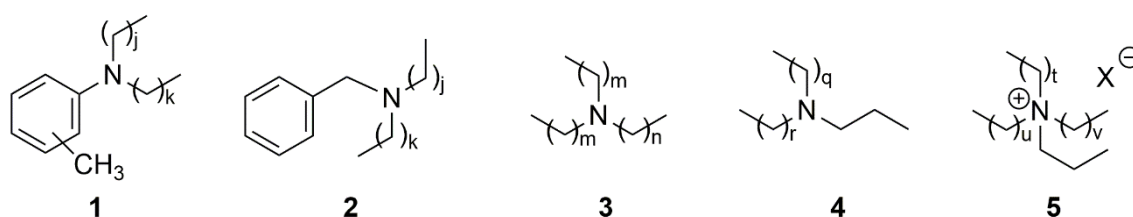

**Figure 1.** Proposed structures of bioactive amine natural products identified as lead compounds in this study;  $(j + k) = 14$ ;  $m = 5$ ,  $n = 9$ ;  $(q + r) = 20$ ;  $(t + u + v) = 19$ ;  $X^-$  = unidentified counterion.

## 93    **2. RESULTS AND DISCUSSION**

94    **2.1. Identification of Active Marine Extracts.** To identify marine samples with  
 95    activity against MRSA, 1434 compounds from the AIMS Bioresources Library<sup>16</sup>  
 96    (provided by the Queensland Compound Library,<sup>17</sup> now called Compounds Australia<sup>18</sup>)  
 97    were screened in a resazurin cell viability assay. Of the samples tested, 29 inhibited the  
 98    growth of MRSA by greater than 50% compared to non-treated controls (Figure S1,  
 99    Supporting Information). Minimum inhibitory concentrations (MICs) were determined  
 100    for the 23 most promising samples, representing extracts and fractions from the phyla  
 101    Porifera (90%), Echinodermata (5%) and Chordata (5% (Table 1 and Table S1). The  
 102    five most active samples showed MICs at 31.3  $\mu\text{g mL}^{-1}$  (all Porifera samples), while  
 103    another four samples returned MICs of 62.5  $\mu\text{g mL}^{-1}$  (also all Porifera).

104

105    Cytotoxicity screens against HepG2, HEK 293, A549 and THP-1 cell lines were  
 106    performed to define the cytotoxicity profile of the most active samples. Pleasingly, all  
 107    the samples most active against MRSA were also nontoxic to the cell lines tested  
 108    (Tables 1, S1, S2 and S3).

109

110

111

112

113

114

115

116 **Table 1. Summary of the Nine Marine Samples Selected for Further Study.**

| Entry    | AIMS Sample Code | QCL Sample Number | MIC<br>( $\mu\text{g mL}^{-1}$ ) | Cytotoxicity (% cell survival) |      |     |
|----------|------------------|-------------------|----------------------------------|--------------------------------|------|-----|
|          |                  |                   | MRSA                             | Hep G2                         | A549 | HEK |
| <b>1</b> | 19033            | SN00733110        | 31.25                            | 91                             | 91   | 98  |
| <b>2</b> | 20608            | SN00760947        | 31.25                            | 97                             | 101  | 102 |
| <b>3</b> | 20608            | SN00760956        | 31.25                            | 100                            | 106  | 95  |
| <b>4</b> | 20608            | SN00760958        | 62.5                             | 98                             | 108  | 95  |
| <b>5</b> | 26051            | SN00731005        | 62.5                             | 101                            | 110  | 98  |
| <b>6</b> | 24307            | SN00730755        | 31.25                            | 100                            | 106  | 96  |

117

118

119

120

121

122

123

124 **2.2. Isolation and Characterization of Bioactive Compounds.** Following the primary  
 125 screening of the AIMS library and selection of positive hits, HPLC was used to separate  
 126 and isolate active compounds, guided by bioassays against MRSA. Extracts were  
 127 fractionated by analytical HPLC (see Experimental section and Supporting Information  
 128 for further details), and fractions evaluated for bioactivity. Preparative scale HPLC was  
 129 carried out on each bulk sample to isolate the active component (Table S4, Figures S2–  
 130 S7), and tandem mass spectrometry (MS/MS) methods used to deduce structures (Table  
 131 2 and Supporting Information).<sup>19-20 21</sup> Insufficient quantities were obtained for NMR  
 132 analyses.

133

134 Active components were isolated and characterised for five of the six extracts shown in  
 135 Table 1: aromatic amines **1/2** from the *Lendenfeldia sp.* samples (AIMS Sample Code  
 136 20608, Table 1 entries 2-4); tertiary aliphatic amine **3** from the *Dysidea herbacea* extract

(AIMS Sample Code 19033, Table 1 entry 1); and aliphatic tertiary amine **4**/ quaternary amine salt **5** from *Ircinia gigantea* (AIMS Sample Code 26051, Table 1 entry 5). The active component of the other active Demospongiae extract (AIMS Sample Code 24307, Table 1 entry 6) could not be isolated.

141

142

143

144

145

146

147

**Table 2. Key MS Data for Bioactive Samples, and Proposed Structures as Shown in Figure 1.**

| Sample             | Molecular ion (m/z)            | Molecular formula                                                                                                | Proposed structures | Spectra    | MS/MS                  |
|--------------------|--------------------------------|------------------------------------------------------------------------------------------------------------------|---------------------|------------|------------------------|
| 19033              | 326.37813<br>[MH] <sup>+</sup> | [C <sub>22</sub> H <sub>48</sub> N] <sup>+</sup><br>Calc. = 326.37802<br>(Δm = 0.11 ppm)<br>RDBE = 0             | <b>3</b>            | Figure S8  | Table S5<br>Figure S9  |
| 20608 <sup>†</sup> | 332.33115<br>[MH] <sup>+</sup> | [C <sub>23</sub> H <sub>42</sub> N] <sup>+</sup><br>Calc = 332.33118<br>(Δm = 0.03 ppm)<br>RDBE = 4 <sup>‡</sup> | <b>1, 2</b>         | Figure S10 | Table S6<br>Figure S11 |
| 26051              | 368.42508<br>[MH] <sup>+</sup> | [C <sub>25</sub> H <sub>54</sub> N] <sup>+</sup><br>Calc. = 368.42495<br>(Δm = 0.13 ppm)<br>RDBE = 0             | <b>4,5</b>          | Figure S12 | Table S7<br>Figure S13 |

<sup>†</sup> The same active species was observed for all three fractions SN00760947, SN00760956 and SN00760958.

<sup>‡</sup> RDBE = ring or double bond equivalents

152

153 **2.3. Synthesis.** To validate the structures proposed for the natural products, and to  
 154 explore the potential of these a compounds as bioactive agents, a series of tertiary amine  
 155 derivatives of compounds **1–5** were synthesised from 1-bromooctane **6**, *m*-toluidine **7**,  
 156 *p*-toluidine **8**, benzyl amine **9**, 1-iododecane **10**, *N,N*-dihexylamine **11** and *N,N,N*-  
 157 trioctylamine **12** (Schemes 1 and 2). *o*-Toluidine is carcinogenic and therefore was not  
 158 used in synthetic experiments.

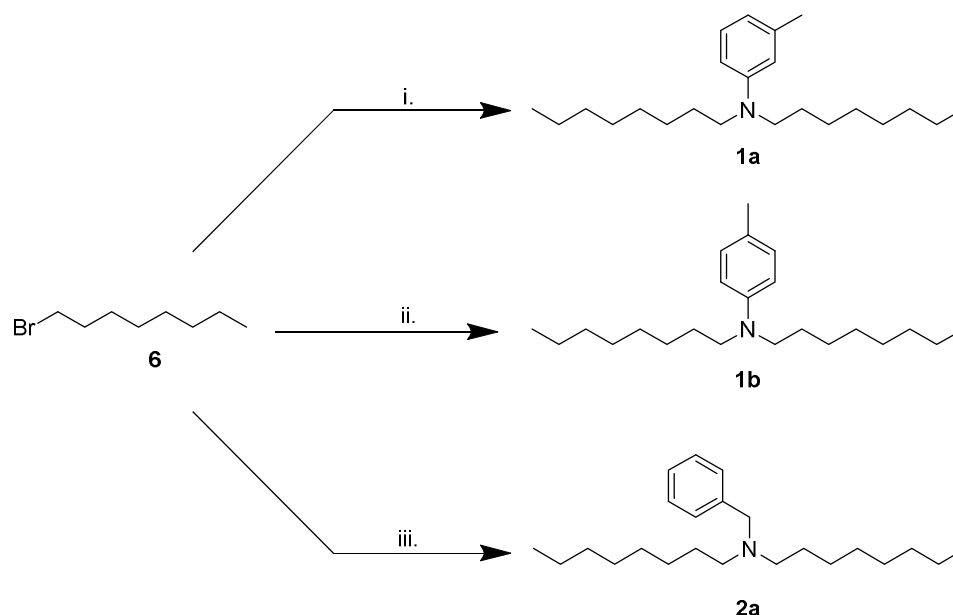

159

160 **Scheme 1. Synthesis of Amines Related to Natural Products 1 and 2.** i. *m*-  
 161 toluidine **7**, K<sub>2</sub>CO<sub>3</sub>, KI, MeCN, 60 °C, overnight, 8 %; ii. *p*-toluidine **8**, K<sub>2</sub>CO<sub>3</sub>, KI,  
 162 MeCN, 60 °C, overnight, 6 %; iii. benzylamine **9**, K<sub>2</sub>CO<sub>3</sub>, MeCN, 82 °C, overnight,  
 163 19 %.

164 Compounds **1a**, **1b** and **2a** were prepared using 1-bromooctane **6** to alkylate *m*-toluidine  
 165 **7**, *p*-toluidine **8**, benzyl amine **9** respectively (Scheme 1), giving three compounds  
 166 based on the active component of AIMS sample 20608. Compound **3**, the active  
 167 component of AIMS sample 19033, was prepared by reacting 1-iododecane **10** with  
 168 *N,N*-dihexylamine **11** (Scheme 2), while *N,N,N*-trioctylamine hydrochloride **13** was



169 prepared from the free amine **12** as a simple and readily accessible analogue of the  
170 natural product structures **4** and **5** that had been isolated from AIMS sample 26051.

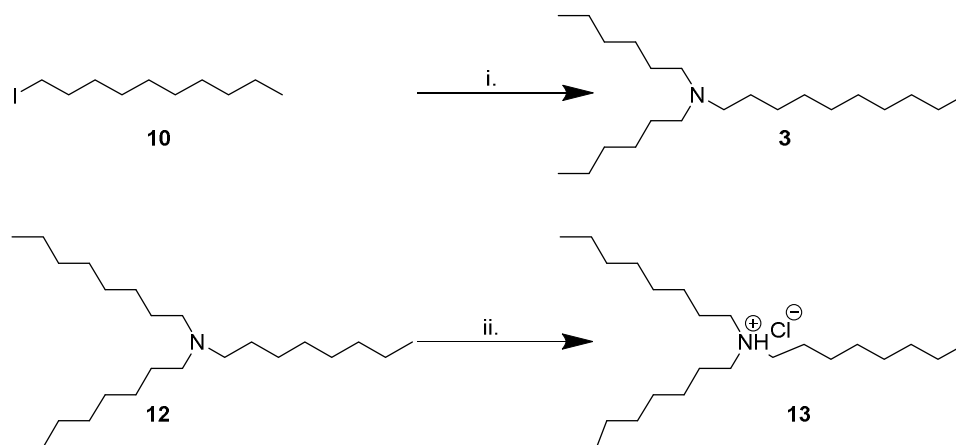

**Scheme 2. Synthesis of Amines Related to Natural Products 3–5.** i. *N,N*-dihexylamine **11**, K<sub>2</sub>CO<sub>3</sub>, MeCN, 82 °C, overnight, 21 %; ii. HCl in 1,4-dioxane, 5 min, 99%.

175 Finally, to broaden the scope of this work, we sought to combine the tertiary amine  
176 structures elucidated in this study with a triazolyl naphthalimide pendant, recently  
177 shown to be an important component of a new class of anti-tubercular agents.<sup>23-24</sup> Thus  
178 *N,N*-dioctylamine **14** was alkylated with 4-bromo-1-butyne **15**, and the resulting alkyne  
179 product **16** ‘clicked’<sup>25</sup> with 6-azido-2-ethyl-1*H*-benzo[*de*]isoquinoline-1,3(2*H*)-dione  
180 **17**<sup>26</sup> to afford the naphthalimide derivative **18** (Scheme 3).

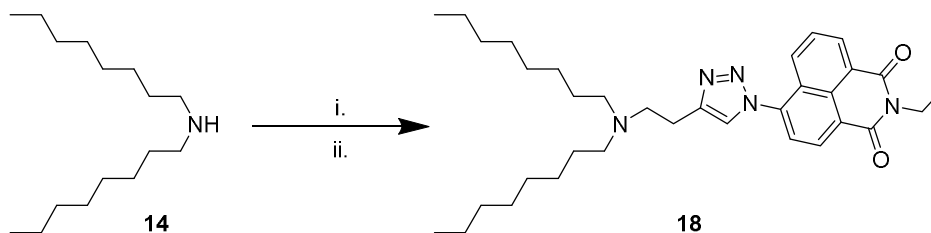

**Scheme 3. Synthesis of Naphthalimide Derivative 18.** i. 4-bromo-1-butyne **15**, K<sub>2</sub>CO<sub>3</sub>, KI, MeCN, 60 °C, overnight, 2 %; ii. 6-azido-2-ethyl-1*H*-

186 benzo[*de*]isoquinoline-1,3(2*H*)-dione **17**, CuSO<sub>4</sub>, sodium ascorbate, <sup>t</sup>BuOH/ H<sub>2</sub>O,  
187 60 °C, overnight, 1 %.

188 While the yields of many synthetic steps were low, sufficient quantities of material were  
189 nonetheless isolated to enable characterisation, and biological evaluation, so the  
190 synthetic reactions were not further optimised.

#### 191 **2.4. Structural Comparison of Synthetic Compounds to Natural Products.**

192 Synthetic compounds were investigated using mass spectrometry (MS/MS and accurate  
193 mass) and analysis of biological activity. Comparing the major ions in the mass spectra  
194 of synthetic **1a** and **1b** (Table S8), **2a** (Table S9), **3** (Table S10) and **13** (Figure S11)  
195 with the natural products shows good correlation (Tables S6, S5 and S7, and Figures S9,  
196 S11 and S13 respectively). Some minor differences are apparent, which most likely arise  
197 due to differences in the amounts of material analysed (which are significantly greater  
198 for the synthesized products), and differences in the instrumentation used.

199

**2.5. Antibacterial Activity and Toxicity of Synthetic Compounds.** Synthetic compounds were assessed for bioactivity against MRSA, *P. aeruginosa*, uropathogenic *E. coli* and *M. tuberculosis*. Interestingly, all synthetic derivatives compounds showed similar MICs against MRSA (the organism against which the original natural product screening assays had been conducted), typically around 12.5  $\mu\text{M}$ . The simple amine salt **13** proved the most effective of the synthetic compounds against *M. tuberculosis* with an MIC of 0.02  $\mu\text{M}$ , and showed moderate inhibitory activity against the other bacteria. Compound **3** displayed broad activity, with low MICs against *P. aeruginosa* (MIC 3.1  $\mu\text{M}$ ), *E. coli* (6.2  $\mu\text{M}$ ) and *M. tuberculosis* (3.1  $\mu\text{M}$ ). The naphthalimide derivative **18** displayed good selective activity against *E. coli* (MIC 1.5  $\mu\text{M}$ ).

**Table 3. Anti-Bacterial Activity of Synthetic Compounds Against MRSA, *P. Aeruginosa*, *E. Coli* and *M. Tuberculosis*.**

| Synthetic compound | MIC ( $\mu\text{M}$ ) <sup>†‡</sup> |                        |                |                      |
|--------------------|-------------------------------------|------------------------|----------------|----------------------|
|                    | MRSA                                | <i>M. tuberculosis</i> | <i>E. coli</i> | <i>P. aeruginosa</i> |
| <b>1a</b>          | 12.5                                | 1.5                    | 12.5           | 6.2                  |
| <b>1b</b>          | 100                                 | 25                     | 100            | 100                  |
| <b>2a</b>          | 12.5                                | 1.5                    | 50             | 50                   |
| <b>3</b>           | 12.5                                | 3.1                    | 6.2            | 3.1                  |
| <b>13</b>          | 12.5                                | 0.02                   | 25             | 25                   |
| <b>18</b>          | 12.5                                | 12.5                   | 1.5            | 12.5                 |

<sup>†</sup> Samples were diluted from 100  $\mu\text{M}$  to 0.0002  $\mu\text{M}$  and incubated with bacteria (starting concentration OD<sub>600</sub>=0.001) under optimum assay conditions as described in the Experimental section.

<sup>‡</sup> Values represents averages from three independent repeats.

The potential toxicity of the synthetic compounds was also evaluated, against A549, THP-1, HepG2 and HEK 293 and cell lines (Table 3). None of the synthetic compounds showed significant toxicity against HepG2 or A549 cells. Synthetic compounds **1a**, **2a**, **3**, **13** and **18** all showed some toxicity against THP1 and/or HEK 293 cells, with Minimum Toxicity Concentrations (MTC) as low as 3.1  $\mu\text{M}$ . Compound **1b** showed low toxicity against all four of these cell lines, but also low activity (Table 4). Compound **1a** showed only mild effects on all cell lines tested (MTC 50–100  $\mu\text{M}$ ), while also displayed a broad antibacterial profile, suggesting this compound may be a candidate for further investigation.

228

229

**Table 4. Toxicity of Synthetic Compounds to Cell Lines.**

230

231

| Synthetic samples | Minimum Toxicity Concentration of Drug (MTC $\mu\text{M}$ ) <sup>†‡§</sup> |       |       |         |
|-------------------|----------------------------------------------------------------------------|-------|-------|---------|
|                   | A549                                                                       | THP1  | HepG2 | HEK 293 |
| <b>1a</b>         | > 100                                                                      | 50    | > 100 | 50      |
| <b>1b</b>         | > 100                                                                      | >100  | > 100 | > 100   |
| <b>2a</b>         | > 100                                                                      | 6.5   | > 100 | 50      |
| <b>3</b>          | >100                                                                       | 50    | > 100 | 25      |
| <b>13</b>         | 50                                                                         | 3.1   | > 100 | 6.5     |
| <b>18</b>         | > 100                                                                      | > 100 | > 100 | 3.1     |

232

233

234

235

<sup>†</sup> Cells seeded at a concentration of  $2 \times 10^5$  cells/ well; samples diluted 100  $\mu\text{M}$  to 0.0002  $\mu\text{M}$ .

<sup>‡</sup> Cells incubated with sample under humidified incubation of 37 °C with 5 %  $\text{CO}_2$ .

<sup>§</sup> Values represents averages of three independent repeats.

Comparing data from the antimicrobial activity and cytotoxicity assays shows that the active concentration ranges for these synthetic compounds against bacteria are substantially lower than active concentration ranges against the mammalian cells tested,

239 particularly HepG2 and A549 cells. THP1 cells and the primary cells appeared more  
240 sensitive to these compounds. Cross-referencing the biological activity and toxicity data  
241 for these compounds suggest that they have some potential for further development.

242 Compounds **1a**, **13** and **18**, which showed the most promising activity against *M.*  
243 *tuberculosis*, were assessed against single and multi-drug resistant *M. tuberculosis*  
244 strains (Table 5). Compound **13** exhibited strong inhibitory activity against all resistant  
245 strains with MICs as low as 0.24  $\mu\text{M}$ ; Compound **1a** showed moderate and variable  
246 activity against all assay strains (MIC 6.7–20.0  $\mu\text{M}$ ) and **18** showed similar activity  
247 against all resistant strains with an MIC of 2.2  $\mu\text{M}$ .

248

249 **Table 5. Activity of synthetic compounds against drug resistant *M. tuberculosis***  
250 **strains.**

| <i>M. tb</i> strain <sup>†</sup> | Minimum inhibitory concentration (MIC) Drug ( $\mu\text{M}$ ) |           |           |
|----------------------------------|---------------------------------------------------------------|-----------|-----------|
|                                  | <b>1a</b>                                                     | <b>13</b> | <b>18</b> |
| sensitive                        | 20                                                            | 0.74      | 2.2       |
| Inh                              | 20                                                            | 0.74      | 6.7       |
| Rif, Inh                         | 20                                                            | 0.74      | 6.7       |
| Rif, Inh, Eth                    | 20                                                            | 0.74      | 6.7       |

251 <sup>†</sup> Rif = resistant to rifampicin; Inh = resistant to isoniazid; Eth = resistant to ethambutol;

252

### 253 **3. CONCLUSIONS**

254 Commercial drugs vancomycin and rifampin remain the reference standard for the  
255 treatment of invasive MRSA and *M. tuberculosis* infections respectively. Yet the  
256 number of vancomycin-resistant *S. aureus* (VRSA) and rifampicin-resistant *M.*

257 *tuberculosis* strains is on the rise. The emergence of antibiotic resistance brings a need  
258 for novel, effective antibacterial agents that are resistant to antimicrobial resistance.

259

260 Thus we assayed 1434 extracts from the AIMS Bioresources Library<sup>16</sup> against MRSA,  
261 finding three samples that have a promising combination of high antibacterial activity  
262 and low toxicity to mammalian cells: AIMS Sample Codes 20608, 26051 and 19033  
263 (Table 1). Samples of these extracts were subjected to HPLC purification and bioassay  
264 guided fractionation, enabling bioactive components to be isolated in low yield (<1 mg).  
265 Then high resolution MS and tandem MS analysis was used to decipher structures  
266 (Table 2, Figure 1). The proposed structures are all tertiary amines or quaternary amine  
267 salts: aromatic amines **1/2** (from *Lendenfeldia* sample number 20608), aliphatic amine **3**  
268 (from *Dysidea herbacea* sample number 19033), the aliphatic tertiary amine **4** and  
269 quaternary amine salt **5** (from *Ircinia sp.* sample number 26051).

270

271 Synthetic compounds based on the natural product structures **1–5** was prepared to  
272 validate and expand these findings. Synthetic compounds **1a**, **1b**, **2a**, **3** and **13** showed  
273 tandem MS fragmentation patterns consistent with the natural product samples, thus  
274 supporting the structures proposed for those samples, and promising bioactivity/  
275 toxicity profiles. Naphthalimide derivative **18** was prepared as a hybrid of the amines  
276 uncovered in this study, and naphthalimide-amine derivatives we have previously  
277 reported as potent anti-mycobacterial agents.<sup>23-24</sup>

278

279 The compounds uncovered in this study add to the growing arsenal of antimicrobial  
280 agents from the sea,<sup>2-3</sup> and offer interesting new avenues for further investigation in the

281 quest for new, effective agents to combat the growing scourge of multidrug resistant  
282 bacteria.

283

## 284 **4. EXPERIMENTAL METHODS**

285 **4.1. General.** Chemical reagents were purchased from BDH Chemicals and Sigma  
286 Aldrich (Castle Hill, Sydney, Australia) and used as supplied unless otherwise indicated.

287

288 **4.2. Natural Product Library.** Natural product extracts were provided by the  
289 Australian Institute of Marine Science (AIMS), Townsville, Queensland as part of the  
290 AIMS Bioresources Library,<sup>16</sup> via the Queensland Compound Library,<sup>17</sup> (now called  
291 Compounds Australia<sup>18</sup>). Crude extracts had been partially fractionated by AIMS/ QCL  
292 to generate a library of 1434 samples, supplied in DMSO (100%) solution and stored at -  
293 80 °C. Original concentrations as provided were 5 mg mL<sup>-1</sup>. Stock solutions were made  
294 by diluting these samples by a factor of 1:10 in dH<sub>2</sub>O and stored at -80 °C.

295

296 **4.3. Screening the AIMS Extract Library Against MRSA.** Each test sample (10  $\mu\text{L}$ )  
 297 was dispensed into a separate well of a 96 well microtiter plates (final sample  
 298 concentration  $0.5 \text{ mg mL}^{-1}$ ) using sterile  $\text{dH}_2\text{O}$ . Bacterial suspension (90  $\mu\text{L}$ ,  $\text{OD}_{600\text{nm}}$   
 299 0.001) was added to each well and plates were incubated at  $37^\circ\text{C}$  for 18 hours. To  
 300 determine MIC of samples, crude extracts were added to wells in sequential 2-fold  
 301 dilutions and incubated with diluted bacteria as described previously.<sup>23-24</sup> Resazurin (10  
 302  $\mu\text{L}$ ; 0.05% w/v) was added and plates were incubated for 3 h at  $37^\circ\text{C}$ . The bioactivity of  
 303 extracts was calculated by visual determination of colour change within wells or  
 304 detection of fluorescence at 590 nm using a FLUOstar Omega microplate reader (BMG  
 305 Labtech, Germany).

306  
 307 **4.4. Evaluating Toxicity of AIMS Extract Library.** Human alveolar epithelial cells  
 308 (A549),<sup>27</sup> Madin-Darby canine kidney epithelial cells (MDCK),<sup>28</sup> human leukaemia  
 309 cells (THP-1),<sup>29</sup> human hepatocellular carcinoma cells (Hep-G2),<sup>30</sup> and human  
 310 embryonic kidney cells 293 (HEK293)<sup>31</sup> were grown and differentiated in complete  
 311 RPMI (Roswell Park Memorial Institute Medium) and DMEM (Dulbecco's Modified  
 312 Eagle's medium) tissue culture media (RPMIc and DMEMc). To determine toxicity of  
 313 the AIMS extract library,  $2 \times 10^5$  of each cell type were added to a 96-well plate and left  
 314 for 48 h at  $37^\circ\text{C}$  to adhere. Extract samples at a final concentration of  $0.5 \text{ mg mL}^{-1}$  were  
 315 added to the wells, then incubated for 7 days in a humidified 5%  $\text{CO}_2$  incubator at  $37^\circ\text{C}$ .  
 316 Then resazurin (10  $\mu\text{L}$  of 0.05% w/v) was added and after 4 h, fluorescence  
 317 measured as described previously. Cell viability was calculated as percentage  
 318 fluorescence relative to untreated cells.

319



## 320 **4.4. Purification of Natural Products from Extracts and Structure Elucidation**

### 321 **4.4.1. High Performance Liquid Chromatography (HPLC) Purification.** Samples

322 were separated using analytical (Waters 2695 Alliance with Waters 2996 PDA, Sunfire  
323 reversed-phase column, and WFIII fraction collector) and preparative (Waters 600  
324 HPLC pump, Phenomenex reversed-phase column, Waters 2487 UV detector and WFIII  
325 fraction collector) HPLC systems with UV detectors at 254 and 280 nm, employing a  
326 gradient of solvents A (dH<sub>2</sub>O) and B (acetonitrile) with trifluoroacetic acid (0.01%).  
327 Extract mixtures were kept at 4 °C until injection, then extract sample (100 µL) was  
328 injected onto an analytical Waters X-bridge C18 100 A (4.6 × 250 mm, 5 µm) reversed-  
329 phase column on the same analytical HPLC system described above. The mobile phase  
330 was obtained using 100% acetonitrile and 0% water at a flow rate of 1 ml min<sup>-1</sup> at 30 °C  
331 over 80 min. Fractions, separated every 60 s, were collected. Purified fractions were  
332 flash-frozen in liquid nitrogen then freeze-dried overnight. The resulting fractionated  
333 extracts were re-suspended in DMSO and antibacterial activity versus MRSA was  
334 determined as described above.

335

336 Fractions identified as active against MRSA were further purified on the preparative  
337 HPLC unit described above, using a C18 100 A (250 × 21.2 mm, 10 µm) reversed-  
338 phase column (Phenomenex) with UV detection at 254 and 280 nm, 7 mL min<sup>-1</sup> flow  
339 rate with water/acetonitrile gradient containing 0.1% trifluoroacetic acid.

340

341 The gradient for AIMS extracts 19033, 20608, and 26051 was 0% B initially, increased  
342 to 40% B over 20 min, then to 100% at 60 min, held at 100% for 10 min, and finally a

343 linear decrease to 0% B over 5 min and held at 0% B for 10 min prior to the next run.  
344 Compounds thus purified were evaluated for biological activity and analysed by MS to  
345 determine potential structures for the bioactive components.

#### 346 **4.4.2. Identification and Structure Elucidation.**

347 Purified compounds were identified and characterised using MS. High resolution ESI  
348 mass spectra (HRMS) were recorded on a Bruker Apex Qe 7T Fourier Transform ion  
349 cyclotron resonance mass spectrometer with an Apollo II ESI MTP ion source with  
350 samples (in CH<sub>3</sub>CN:H<sub>2</sub>O 1:1) infused using a Cole Palmer syringe pump at 180 µL h<sup>-1</sup>.  
351 Where required, low resolution ESI tandem MS was performed on a Bruker amaZon SL  
352 ion trap via syringe infusion or by injection into a constant flow stream with a rheodyne  
353 valve and an Alltech HPLC pump (mobile phase methanol, flow rate 0.3 mL min<sup>-1</sup>)  
354 connected to an Apollo II ESI MTP ion source in positive ion mode. Tandem mass  
355 spectra of the [M+H]<sup>+</sup> parent ion were obtained manually up to MS<sup>5</sup> (depending on  
356 sensitivity). Spectra were acquired in positive ion mode using a 1–4 Da isolation  
357 window, with the excitation amplitude manually optimized for each spectrum to have  
358 the selected mass at ~10% of the height of the largest fragment. Data analysis was  
359 performed for both high resolution MS and low resolution tandem MS data using  
360 Bruker DataAnalysis 4.0 with smart formula assuming C, H, N, O, Na (0-1), mass error  
361 <2 ppm, C:H ratio 3 maximum, even electron (or both for tandem MS data). The results  
362 of high resolution MS data analysis were further refined manually by comparing  
363 isotopic fine structures of simulations where possible (resolving power > 200,000) to  
364 further eliminate potential formulae within the 2ppm mass error window (particularly  
365 <sup>15</sup>N, <sup>18</sup>O, <sup>2</sup>H, <sup>13</sup>C and <sup>13</sup>C<sub>2</sub> isotopes and confirm no <sup>34</sup>S presence).

366

## 367 4.5. Synthesis

368 **4.5.1. *N,N*-Diocetyl-3-methylaniline 1a.** To a solution of 1-bromooctane 6 (6.3 mL, 36.6  
369 mmol) in acetonitrile (50 mL) was added potassium carbonate (25.3 g, 183 mmol), KI  
370 (6.08 g, 36.6 mmol) and m-toluidine 7 (1.96 mL, 18.3mmol) stirred at 60 °C overnight.  
371 The suspension was filtered and washed with acetonitrile (3 × 50 mL), then  
372 concentrated by rotary evaporation to yield the crude product (1.50 g). Purification by  
373 automated column chromatography (100 g cartridge, 100% petroleum benzine over 12  
374 CV) then by preparative TLC (10% ethyl acetate:petroleum benzine) afforded the pure  
375 compound 1a as a yellow oil (0.46 g, 8 %). <sup>1</sup>H NMR (500 MHz, CDCl<sub>3</sub>): δ 7.13 – 7.07  
376 (m, 1 H), 6.50 – 6.44 (m, 3 H), 3.28 – 3.22 (m, 4 H), 2.32 (s, 3 H), 1.64 – 1.53 (m, 4 H),  
377 1.38 – 1.24 (m, 20 H), 0.94 – 0.87 (m, 6 H); <sup>13</sup>C NMR (125 MHz, CDCl<sub>3</sub>): δ 148.3,  
378 138.7, 129.0, 116.0, 112.4, 109.0, 51.0, 31.8, 29.5, 29.3, 27.3, 27.2, 22.7, 22.0, 14.1;  
379 LRMS (ESI+): m/z 332.33 [M+H]<sup>+</sup>, 100%; HRMS (ESI): m/z calculated for [C<sub>23</sub>H<sub>42</sub>N]<sup>+</sup>,  
380 [M + H]<sup>+</sup> 332.3317, found 332.33054.

381

382 **4.5.2. *N,N*-Diocetyl-4-methylaniline 1b.** To a solution of 1-bromooctane 6 (6.3 mL, 36.6  
383 mmol) in acetonitrile (50 mL) was added potassium carbonate (25.3 g, 183 mmol), KI  
384 (6.08 g, 36.6 mmol) and p-toluidine 8 (1.96g, 18.3 mmol) stirred at 60 °C overnight.  
385 The suspension was filtered then concentrated by rotary evaporation to yield the crude  
386 product (1.65 g). Purification by automated column chromatography (100 g cartridge,  
387 100% petroleum benzine over 4 CV, ramping to 100% ethyl acetate over 4 CV) gave the  
388 product 1b as a yellow oil (0.39 g, 6 %). <sup>1</sup>H NMR (500 MHz, CDCl<sub>3</sub>): δ 7.02 (d, J = 8.2

389 Hz, 2 H), 6.68 – 6.47 (m, 2 H), 3.33 – 3.10 (m, 4 H), 2.25 (s, 3 H), 1.58 - 1.52 (m, 4 H),  
 390 1.40 – 1.20 (m, 20 H), 0.95 – 0.82 (m, 6 H);  $^{13}\text{C}$  NMR (125 MHz,  $\text{CDCl}_3$ ):  $\delta$  146.2,  
 391 129.7, 124.3, 112.2, 51.3, 31.9, 29.5, 29.4, 27.3, 27.2, 22.7, 20.1, 14.1; LRMS (ESI<sup>+</sup>):  
 392 m/z 332.33  $[\text{M}+\text{H}]^+$ , 100%; HRMS (ESI): m/z calculated for  $[\text{C}_{23}\text{H}_{42}\text{N}]^+ [\text{M}+\text{H}]^+$   
 393 332.3317, found 332.33095.

394

395 **4.5.3. N-Benzyl-N-octyloctan-1-amine 2a.** To a solution of 1-bromooctane 6 (6.3 mL,  
 396 36.6 mmol) in acetonitrile (50 mL) were added potassium carbonate (25.3 g, 183 mmol)  
 397 and benzylamine 9 (2 mL, 18 mmol) then stirred at 60 °C overnight. The mixture, a clear  
 398 colourless solution, was concentrated using the rotary evaporator, to give a white solid.  
 399 The solid was triturated with DCM (1 × 50 mL, 1 × 25 mL) and the DCM solution  
 400 concentrated on the rotary evaporator to yield yellow oil (5.1 g). Purification by  
 401 automated column chromatography (100 g cartridge, 0–40% ethyl acetate (EtOAc) in  
 402 petroleum benzine over 10 CV) yielded N-benzyl-N-octyloctan-1-amine 2a as a  
 403 colourless oil (1.15 g, 19 %).  $^1\text{H}$  NMR (500 MHz,  $\text{CDCl}_3$ ):  $\delta$  7.36 – 7.29 (m, 4H), 7.26 –  
 404 7.21 (m, 1H), 3.56 (s, 2H), 2.47 – 2.35 (m, 4H), 1.54 – 1.41 (m, 4H), 1.36 – 1.21 (m,  
 405 20H), 0.90 (t, J = 7.0 Hz, 6H);  $^{13}\text{C}$  NMR (125 MHz,  $\text{CDCl}_3$ ):  $\delta$  140.3, 128.8, 128.0,  
 406 126.6, 58.6, 53.8, 31.9, 29.6, 29.3, 27.5, 27.0, 22.7, 14.1; LRMS (ESI<sup>+</sup>): m/z 332.33  
 407  $[\text{M}+\text{H}]^+$ , 100%; HRMS (ESI): m/z calculated for  $[\text{C}_{23}\text{H}_{42}\text{N}]^+ [\text{M} + \text{H}]^+$  332.3317, found  
 408 332.3306.

409

410 **4.5.4. N,N-Dihexyldecan-1-amine 3.** To a solution of 1-iododecane 10 (2.75 mL, 12.9  
 411 mmol) in acetonitrile (60 mL) was added potassium carbonate (16.5 g, 129 mmol) and

412 dihexylamine 11 (3 mL, 12.9 mmol), then the mixture was stirred at reflux overnight.  
 413 The suspension was filtered to remove  $K_2CO_3$  and washed with acetonitrile ( $3 \times 50$  mL),  
 414 then concentrated by rotary evaporation to yield the crude product (7.8 g). The crude  
 415 product was purified by automated column chromatography (100 g cartridge, 100%  
 416 petroleum benzene 2CV, then 0–60% ethyl acetate in petroleum benzene over 10 CV) to  
 417 yield the product as an oil (0.89 g, 21 %).  $^1H$  NMR (500 MHz,  $CDCl_3$ ):  $\delta$  2.41 – 2.37  
 418 (m, 6 H), 1.38– 1.46 (m, 6 H), 1.35 – 1.21 (m, 28 H), 0.91 – 0.86 (m, 9 H);  $^{13}C$  NMR  
 419 (125 MHz,  $CDCl_3$ ):  $\delta$  54.2, 54.2, 31.9, 31.9, 29.7, 29.6, 29.6, 29.3, 27.7, 27.4, 26.9,  
 420 22.7, 14.1, 14.1; LRMS (ESI<sup>+</sup>):  $m/z$  326.41  $[M+H]^+$ , 100%; HRMS (ESI):  $m/z$   
 421 calculated for  $[C_{22}H_{48}N]^+$   $[M + H]^+$  326.3787, found 326.3776.

422 **4.5.5. *N,N,N*-Trioctylammonium chloride 13.** To a solution of *N,N,N*-trioctylamine 12  
 423 (1.0 g, 2.80 mmol) in 1,4-dioxane (1.0 mL) was added 4M HCl in dioxane (2.80 mL,  
 424 11.2 mmol) in an ice bath. Instantaneously a precipitate formed and after 5 min this was  
 425 collected by vacuum filtration to yield a white solid (1.08 g, 99 % yield).  $^1H$  NMR (500  
 426 MHz,  $CDCl_3$ )  $\delta$  11.40 (br s, 1 H), 2.90 (td,  $J = 4.7, 12.5$  Hz, 6 H), 1.74 – 1.66 (m, 6 H),  
 427 1.29 – 1.13 (m, 30 H), 0.79 (t,  $J = 7.0$  Hz, 9 H);  $^{13}C$  NMR (125 MHz,  $CDCl_3$ )  $\delta$  52.2,  
 428 31.4, 28.8, 28.7, 26.6, 23.0, 22.3, 13.8.

429

430 **4.5.6. *N*-(But-3-yn-1-yl)-*N*-octyloctan-1-amine 16.** To a flask charged with potassium  
 431 carbonate (4.4 g, 31.8 mmol) and potassium iodide (880 mg, 5.30 mmol) was added  
 432 acetonitrile (72 mL) followed by dioctylamine 14 (8 mL, 26.5 mmol) and 4-bromo-1-  
 433 butyne 15 (2.74 mL, 29.2 mmol). The suspension was stirred at 60°C for 18 h,  
 434 then filtered and washed with acetonitrile ( $3 \times 50$  mL), and concentrated by rotary

evaporation to yield the crude product. This was purified by automated column chromatography (100 g cartridge, 0%–15% ethyl acetate in petroleum benzine over 10 CV) to yield the product as a yellow oil (0.15 g, 2%). <sup>1</sup>H NMR (500 MHz, CDCl<sub>3</sub>): δ 2.64 - 2.57 (m, 2 H), 2.39 - 2.31 (m, 4 H), 2.23 (dt, J = 2.7, 7.6 Hz, 2 H), 1.88 (t, J = 2.6 Hz, 1 H), 1.41 - 1.31 (m, 4 H), 1.27 - 1.14 (m, 20 H), 0.81 (t, J = 7.0 Hz, 6 H); <sup>13</sup>C NMR (125 MHz, CDCl<sub>3</sub>): δ 83.3, 68.7, 54.0, 52.7, 31.8, 29.6, 29.3, 27.6, 27.2, 22.6, 16.7, 14.1; LRMS (ESI<sup>+</sup>): m/z 294.29 [M+H]<sup>+</sup>, 100%; HRMS (ESI): m/z calculated for C<sub>20</sub>H<sub>40</sub>N<sup>+</sup> [MH]<sup>+</sup> 294.3161, found 294.3157.

443

**4.5.7. 6-(4-(2-(Diocetyl amino) ethyl)-1H-1,2,3-triazol-1-yl)-2-ethyl-1H-benzo[de]isoquinoline-1,3(2H)-dione 18.** To a solution of 16 (400 mg, 1.24 mmol) and 6-azido-2-ethyl-1H-benzo[de]isoquinoline-1,3(2H)-dione 17 (365 mg, 1.61 mmol) in tert-butanol: water (12.4 mL) were added copper sulphate hexahydrate (31.0 mg, 0.12 mmol) and ascorbic acid sodium salt (73.8 mg, 0.37 mmol) then the solution was stirred at 60°C overnight. Precipitants were removed by filtration and washed with acetonitrile (3 x 50 mL), then the filtrate was concentrated by rotary evaporation and purified by automated column chromatography (100g cartridge, 0%–20% methanol in dichloromethane over 8 CV). Purified fractions were re-purified by automated reversed phase chromatography (30g cartridge C18 silica (Biotage), 0%–90% acetonitrile in water over 17 CV) and concentrated to yield the product as a yellow solid (10 mg, 1%). <sup>1</sup>H NMR (500 MHz, CDCl<sub>3</sub>): δ 8.73 (d, J = 7.6 Hz, 2 H), 8.21 (dd, J = 0.9, 8.5 Hz, 1 H), 8.09 (s, 1 H), 7.89 - 7.81 (m, 2 H), 4.29 (q, J = 7.1 Hz, 2 H), 3.67 - 3.56 (m, 2 H), 3.49 - 3.37 (m, 2 H), 3.25 - 3.06 (m, 4 H), 1.87 - 1.70 (m, 4 H), 1.38 (t, J = 7.0 Hz, 3 H), 1.34 -

458 1.23 (m, 10 H), 0.89 (t, J = 7.0 Hz, 6 H); <sup>13</sup>C NMR (126 MHz, CDCl<sub>3</sub>): δ 162.4, 161.9,  
459 142.1, 136.8, 131.2, 129.6, 128.1 (128.09), 128.1 (128.08), 127.7, 125.4, 124.1, 123.2,  
460 122.6, 122.1, 51.6, 51.3, 34.8, 30.6, 28.7, 28.0, 25.7, 22.0, 21.5, 20.1, 13.0, 12.3; LRMS  
461 (ESI<sup>+</sup>): m/z 560.38 [M+H]<sup>+</sup>, 100%; HRMS (ESI): m/z calculated for  
462 C<sub>34</sub>H<sub>50</sub>N<sub>5</sub>O<sub>2</sub><sup>+</sup> [MH]<sup>+</sup> 560.3965, found 560.3950.

463

464 **4.6. Screening of Synthetic Compounds.** MRSA (provided by Dr John Merlino at  
465 Concord Hospital, Sydney), *P. aeruginosa* PAO1 (provided by Dr Jim Manos,  
466 University of Sydney) and *E. coli* EC958 (provided by Professor Mark Schembri,  
467 University of Queensland) were grown in LB media. *M. tuberculosis* H37Rv was grown  
468 in Middlebrook 7H9 media (Bacto, Australia) containing albumin, dextrose, and  
469 catalase (ADC), 20% Tween 80, and 50% glycerol (Sigma-Aldrich, Australia). The  
470 synthetic samples were suspended in DMSO and diluted in series to final concentrations  
471 of 100 μM – 0.001μM, using sterile dH<sub>2</sub>O. Antibacterial activities and toxicity were  
472 determined for each compound via broth dilution resazurin assay as described above.

473

## 474 ■ ASSOCIATED CONTENT

### 475 Supporting Information

476

477 Bioactivity and toxicity screening data, HPLC fractionation and purification protocols,  
478 plus mass spectrometry data (HRMS spectra, tables of daughter ions, and proposed  
479 fragmentation pathways) for natural products and synthetic compounds.

480

## 481 ■ AUTHOR INFORMATION

482 Corresponding Author

483 PJR: phone +61 2 9351 5020, e-mail peter.rutledge@sydney.edu.au;

484 JAT: phone +61 2 9036 6582, email jamie.triccas@sydney.edu.au

485

## 486 **Funding Sources**

487 NHMRC Project Grant APP1084266

488

## 489 **■ Author Contribution Statement**

490 PJR, JAT, MD, NP (mass spectrometry) and MPS (synthesis) conceived and designed  
491 the experiments; MD, NP (mass spectrometry), MPS (synthesis) and GT (bioassays with  
492 virulent *M. tuberculosis*) performed the experiments; MD, NP, MPS, GT, JAT and PJR  
493 analyzed the data; MD, PJR, MPS and JAT wrote the paper.

494

## 495 **Notes**

496 The authors declare no competing financial interest

497

## 498 **■ ACKNOWLEDGEMENT**

499 We thank Dr Cody Szczepina for his assistance developing HPLC methods for natural  
500 product isolation and purification. We thank Dr John Merlino (Concord Hospital,  
501 Sydney), Dr Jim Manos (University of Sydney) and Professor Mark Schembri  
502 (University of Queensland) for provision of the MRSA, *P. aeruginosa* PAO1 and *E. coli*  
503 EC958 strains respectively. This work was supported by the National Health and  
504 Medical Research Council (NHMRC) Project APP1084266, the NHMRC Centre of  
505 Research Excellence in Tuberculosis Control (APP1043225), and the University of  
506 Sydney. MD was supported by an International Postgraduate Research Scholarship  
507 (IPRS) and Australian Postgraduate Award (APA) from the Australian Government.

508

## 509 **■ ABBREVIATIONS**

510 A549, human alveolar epithelial cells; AIMS, Australian Institute for Marine Science;  
511 DMEM, Dulbecco's Modified Eagle's medium; HEK293, human embryonic kidney cells  
512 293; HPLC, high-performance liquid chromatography; HTS, high-throughput screening;  
513 MDCK, Madin-Darby canine kidney epithelial cells; MIC, minimum inhibitory  
514 concentration; MRSA, methicillin resistant *Staphylococcus aureus*; MS, mass



515 spectrometry; MS/MS, tandem mass spectrometry; MTC, minimum toxic concentration;  
 516 NMR, nuclear magnetic resonance; RPMI, Roswell Park Memorial Institute Medium;  
 517 THP-1, human leukaemia cells; Hep-G2, human hepatocellular carcinoma cells; VRSA,  
 518 vancomycin-resistant *Staphylococcus aureus*.

519

## 520 ■ REFERENCES

- 521 1. Molinski, T. F.; Dalisay, D. S.; Lievens, S. L.; Saludes, J. P., Drug development  
 522 from marine natural products. *Nat. Rev. Drug Discovery* **2008**, 8, 69-85.
- 523 2. Hughes, C. C.; Fenical, W., Antibacterials from the Sea. *Chem. Eur. J.* **2010**, 16  
 524 (42), 12512-12525.
- 525 3. Indraningrat, A.; Smidt, H.; Sipkema, D., Bioprospecting Sponge-Associated  
 526 Microbes for Antimicrobial Compounds. *Mar. Drugs* **2016**, 14 (5), 87.
- 527 4. Mehbub, M. F.; Perkins, M. V.; Zhang, W.; Franco, C. M. M., New marine  
 528 natural products from sponges (Porifera) of the order Dictyoceratida (2001 to 2012); a  
 529 promising source for drug discovery, exploration and future prospects. *Biotechnol. Adv.*  
 530 **2016**, 34 (5), 473-491.
- 531 5. Schroeder, G.; Bates, S. S.; La Barre, S., Bioactive Marine Molecules and  
 532 Derivatives with Biopharmaceutical Potential. In *Blue Biotechnology*, Barre, S. L.;  
 533 Bates, S. S., Eds. 2018.
- 534 6. Newman, D. J.; Cragg, G. M., Natural Products as Sources of New Drugs from  
 535 1981 to 2014. *J. Nat. Prod.* **2016**, 79 (3), 629-661.
- 536 7. Pye, C. R.; Bertin, M. J.; Lokey, R. S.; Gerwick, W. H.; Linington, R. G.,  
 537 Retrospective analysis of natural products provides insights for future discovery trends.  
 538 *Proc. Nat. Acad. Sci. U.S.A.* **2017**, 114 (22), 5601-5606.
- 539 8. Blunt, J. W.; Copp, B. R.; Keyzers, R. A.; Munro, M. H. G.; Prinsep, M. R.,  
 540 Marine natural products. *Nat. Prod. Rep.* **2017**, 34 (3), 235-294.
- 541 9. Blunt, J. W.; Carroll, A. R.; Copp, B. R.; Davis, R. A.; Keyzers, R. A.; Prinsep,  
 542 M. R., Marine natural products. *Nat. Prod. Rep.* **2018**, 35 (1), 8-53.
- 543 10. McGivern, J. G., Ziconotide: a review of its pharmacology and use in the  
 544 treatment of pain. *Neuropsychiatr. Dis. Treat.* **2007**, 3 (1), 69-85.

- 545 11. Gordon, E. M.; Sankhala, K. K.; Chawla, N.; Chawla, S. P., Trabectedin for Soft  
546 Tissue Sarcoma: Current Status and Future Perspectives. *Adv. Ther.* **2016**, *33* (7), 1055-  
547 1071.
- 548 12. Bassetti, M.; Baguneid, M.; Bouza, E.; Dryden, M.; Nathwani, D.; Wilcox, M.,  
549 European perspective and update on the management of complicated skin and soft tissue  
550 infections due to methicillin-resistant *Staphylococcus aureus* after more than 10 years of  
551 experience with linezolid. *Clin Microbiol Infect* **2014**, *20 Suppl 4*, 3-18.
- 552 13. Dookie, N.; Rambaran, S.; Padayatchi, N.; Mahomed, S.; Naidoo, K., Evolution  
553 of drug resistance in *Mycobacterium tuberculosis*: a review on the molecular  
554 determinants of resistance and implications for personalized care. *J. Antimicrob.*  
555 *Chemother.* **2018**, *73* (5), 1138-1151.
- 556 14. Pourakbari, B.; Mamishi, S.; Mohammadzadeh, M.; Mahmoudi, S., First-Line  
557 Anti-Tubercular Drug Resistance of *Mycobacterium tuberculosis* in IRAN: A  
558 Systematic Review. *Front. Microbiol.* **2016**, *7*, 1139.
- 559 15. Lopez-Avalos, G.; Gonzalez-Palomar, G.; Lopez-Rodriguez, M.; Vazquez-  
560 Chacon, C. A.; Mora-Aguilera, G.; Gonzalez-Barrios, J. A.; Villanueva-Arias, J. C.;  
561 Sandoval-Diaz, M.; Miranda-Hernández, U.; Alvarez-Maya, I., Genetic diversity of  
562 *Mycobacterium tuberculosis* and transmission associated with first-line drug resistance:  
563 a first analysis in Jalisco, Mexico. *J. Glob. Antimicrob. Resist.* **2017**, *11*, 90-97.
- 564 16. Evans-Illidge, E. A.; Logan, M.; Doyle, J.; Fromont, J.; Battershill, C. N.;  
565 Ericson, G.; Wolff, C. W.; Muirhead, A.; Kearns, P.; Abdo, D.; Kininmonth, S.;  
566 Llewellyn, L., Phylogeny drives large scale patterns in Australian marine bioactivity and  
567 provides a new chemical ecology rationale for future biodiscovery. *PLoS One* **2013**, *8*  
568 (9), e73800.
- 569 17. Simpson, M.; Poulsen, S.-A., An Overview of Australia's Compound  
570 Management Facility: The Queensland Compound Library. *ACS Chem. Biol.* **2014**, *9*  
571 (1), 28-33.
- 572 18. Compounds Australia. [https://www.griffith.edu.au/griffith-sciences/compounds-](https://www.griffith.edu.au/griffith-sciences/compounds-australia)  
573 [australia](https://www.griffith.edu.au/griffith-sciences/compounds-australia) (accessed 20 September 2018).
- 574 19. Bouslimani, A.; Sanchez, L. M.; Garg, N.; Dorrestein, P. C., Mass spectrometry  
575 of natural products: current, emerging and future technologies. *Nat. Prod. Rep.* **2014**, *31*  
576 (6), 718-729.
- 577 20. Kind, T.; Fiehn, O., Advances in structure elucidation of small molecules using  
578 mass spectrometry. *Bioanal. Rev.* **2010**, *2* (1), 23-60.
- 579 21. Herbert Júnior, D.; Nathalya Isabel de, M.; Antônio Eduardo Miller, C.,  
580 Electrospray Ionization Tandem Mass Spectrometry as a Tool for the Structural  
581 Elucidation and Dereplication of Natural Products: An Overview. In *Tandem Mass*  
582 *Spectrometry - Applications and Principles*, Prasain, J., Ed. InTech: 2012.

- 583 22. Kernan, M. R.; Faulkner, D. J., Sesterterpene sulfates from a sponge of the  
584 family Halichondriidae. *J. Org. Chem.* **1988**, *53* (19), 4574-4578.
- 585 23. Yu, M.; Nagalingam, G.; Ellis, S.; Martinez, E.; Sintchenko, V.; Spain, M.;  
586 Rutledge, P. J.; Todd, M. H.; Triccas, J. A., Nontoxic Metal–Cyclam Complexes, a New  
587 Class of Compounds with Potency against Drug-Resistant *Mycobacterium tuberculosis*.  
588 *J. Med. Chem.* **2016**, *59* (12), 5917-5921.
- 589 24. Spain, M.; Wong, J. K. H.; Nagalingam, G.; Batten, J. M.; Hortle, E.; Oehlers, S.  
590 H.; Jiang, X. F.; Murage, H. E.; Orford, J. T.; Crisologo, P.; Triccas, J. A.; Rutledge, P.  
591 J.; Todd, M. H., Antitubercular Bis-Substituted Cyclam Derivatives: Structure–Activity  
592 Relationships and in Vivo Studies. *J. Med. Chem.* **2018**, *61* (8), 3595-3608.
- 593 25. Wong, J. K.-H.; Ast, S.; Yu, M.; Flehr, R.; Counsell, A. J.; Turner, P.; Crisologo,  
594 P.; Todd, M. H.; Rutledge, P. J., Synthesis and Evaluation of 1,8-Disubstituted-  
595 Cyclam/Naphthalimide Conjugates as Probes for Metal Ions. *ChemistryOpen* **2016**, *5*  
596 (4), 375-385.
- 597 26. Yu, M.; Yu, Q.; Rutledge, P. J.; Todd, M. H., A Fluorescent “Allosteric  
598 Scorpionand” Complex Visualizes a Biological Recognition Event. *ChemBioChem*  
599 **2013**, *14* (2), 224-229.
- 600 27. Giard, D. J.; Aaronson, S. A.; Todaro, G. J.; Arnstein, P.; Kersey, J. H.; Dosik,  
601 H.; Parks, W. P., In vitro cultivation of human tumors: establishment of cell lines  
602 derived from a series of solid tumors. *J Natl Cancer Inst* **1973**, *51* (5), 1417-23.
- 603 28. Gaush, C. R.; Hard, W. L.; Smith, T. F., Characterization of an established line  
604 of canine kidney cells (MDCK). *Proc Soc Exp Biol Med* **1966**, *122* (3), 931-5.
- 605 29. Tsuchiya, S.; Yamabe, M.; Yamaguchi, Y.; Kobayashi, Y.; Konno, T.; Tada, K.,  
606 Establishment and characterization of a human acute monocytic leukemia cell line  
607 (THP-1). *Int J Cancer* **1980**, *26* (2), 171-6.
- 608 30. Aden, D. P.; Fogel, A.; Plotkin, S.; Damjanov, I.; Knowles, B. B., Controlled  
609 synthesis of HBsAg in a differentiated human liver carcinoma-derived cell line. *Nature*  
610 **1979**, *282* (5739), 615-6.
- 611 31. Graham, F. L.; Smiley, J.; Russell, W. C.; Nairn, R., Characteristics of a human  
612 cell line transformed by DNA from human adenovirus type 5. *J Gen Virol* **1977**, *36* (1),  
613 59-74.

614
